# Supplementary material for: Technical aspects and clinical applications of synthetic MRI: a scoping review
Source: publisher site journal article supplement (doi:10.1515/dx-2024-0168), 2025-02-06
Supplement: Supplementary file 1 [file j_dx-2024-0168_suppl_002.docx]

**Supplemental Table 1. Specifications of research articles included in the review.**

| **First Author** | **Publication Date** | **Place** | **Study direction** | **MRI Machine** | **Field Strength** | **Population** | **Sample size N** | **No. of Males** |
| --- | --- | --- | --- | --- | --- | --- | --- | --- |
| Blystad et al[12] | Dec-12 | Sweden | Prospective | Achieve, Philips | 1.5 | Adults | 22 | NR |
| Tisell et al[13] | Nov-12 | Sweden | Prospective | Philips Achieva 1.5 T | 1.5 | Adults | 47 | 17 |
| Hagiwara et al[14] | Oct-17 | Japan | Prospective | Discovery MR750w 3T, GE | 3 | Adults | 20 | 5 |
| Lee et al[15] | Oct-17 | Korea | Retrospective | Discovery MR 750 3T GE | 3 | 34 weeks of GA to <18 children | 89 | 35 |
| Kim et al[16] | Aug-17 | South Korea | Retrospective | GE MRI 750w 3T | 3 | Children | 22 | 12 |
| Lee et al[17] | Jun-17 | South Korea | Prospective | Discovery MR 750 3T; GE | 3 | Children | 29 | 14 |
| Hagiwara et al[18] | Jul-18 | Japan | Prospective | MAGNETOM Prisma, Siemens | 3 | Adults | 20 | 9 |
| Andica et al[19] | May-18 | Japan | Prospective | Ingenia Philips 1.5T | 1.5 | Adults | 10 | 5 |
| Krauss et al[20] | Apr-18 | Sweden | Prospective | Philips Achieva | 1.5 | Adults | 52 | 11 |
| Warntjes et al[21] | Feb-18 | Sweden | Prospective | Achieva Philips | 1.5 | Adults | 38 | 28 |
| Pérez et al[22] | Ap-18 | Switzerland | Prospective | Ingenia Philips 1.5T | 1.5 | Adults | 32 | 17 |
| Tachibana et al[23] | Dec-19 | China | Prospective | MAGNETOM Prisma, Siemens | 3 | Adults | 20 | 9 |
| Saccenti et al[24] | Nov-19 | Japan | Prospective | MAGNETOM Prisma, Siemens | 3 | Adults | 29 | 3 |
| Hagiwara et al[25] | Oct-19 | Japan | Prospective case-control | Discovery MR750w 3T GE | 3 | Adults | 48 | 10 |
| Serai et al[26] | Oct-19 | USA | Prospective | Ingenia Philips, Discovery MR750w GE | 1.5 and 3 | Pediatrics | 176 | 69 |
| Arita et al[27] | Oct-19 | Japan | Prospective | Ingenia Philips | 3 | Adults | 93 | 93 |
| Park et al[28] | Sep-19 | Korea | Retrospective | Discovery MR750w; GE | 3 | Adults | 99 | 26 |
| Zhang et al[29] | Sep-19 | China | Prospective | Signa Pioneer, GE 3T | 3 | Adults | 84 | 37 |
| Andica et al[30] | Jul-19 | Japan | Prospective | Discovery MR 750 3T GE | 3 | Children | 14 | NR |
| Andica et al[31] | May-19 | Japan | Prospective | Discovery MR750w 3T GE | 3 | Adults | 57 | 12 |
| Kerleroux et al[32] | Mar-19 | France | Prospective case-control | MAGNETOM Aera, Siemens | 1.5 | Pediatrics | 60 | 33 |
| Maekawa et al[33] | Feb-19 | Japan | Retrospective | Discovery MR750w 3T GE | 3 | Adults | 36 | 21 |
| Fujiwara et al[34] | Jan-19 | Japan | Prospective | Discovery MR750, 3T GE | 3 | Adults | 10 | NR |
| Hagiwara et al[35] | Jan-19 | Japan | Prospective | 3 Scanners | 3 | Phantom and HC | 10 | 3 |
| Meng et al[36] | Dec-20 | China | Prospective | Signa Pioneer, GE 3T | 3 | Adults | 87 | 0 |
| Mangeat et al[37] | Sep-20 | Sweden | Prospective | Siemens Aera 1.5T, PrismaFit 3T | 1.5, 3 | Adults | 18 | 5 |
| Goto et al[38] | Sep-20 | Japan | Prospective | Discovery MR750w 3T GE | 3 | Adults | 24 | 8 |
| Giuliano et al[39] | Aug-20 | Italy | Prospective | Signa Voyager GE 1.5T | 1.5 | Adults | 51 | 16 |
| Saccenti et al[40] | Feb-20 | Japan | Prospective | MAGNETOM Prisma, Siemens | 3 | Adults | 21 | 2 |
| Wang et al[41] | Dec-21 | China | Retrospective | SIGNA Pioneer, GE 3T | 3 | Adults | 64 | 44 |
| Kimura et al[42] | Dec-21 | Japan | Prospective | Galan; Canon Medical Systems | 3 | Adult | 1 | NR |
| Cai et al[43] | Dec-21 | China | Prospective | Signa Pioneer, GE | 3 | Adults | 60 | 48 |
| Gonzalez et al[44] | Nov-21 | Netherlands | Prospective | 1.5 T GE MR450 and a 3.0 T GE MR750 | 1.5, 3 | Phantom and 5 HC | 5 | 2 |
| Schmidbauer et al[45] | Nov-21 | Austria | Retrospective | Ingenia; Philips | 1.5 | Fetus | 52 | NR |
| Chen et al[46] | Oct-21 | China | Prospective | SIGNA Pioneer MR, GE 3T | 3 | Pediatrics | 76 | 66 |
| Montejo et al[47] | Oct-21 | Spain | Prospective | PRISMA, Siemens 3T | 3 | Adults | 20 | 6 |
| Suh et al[48] | Sep-21 | Korea | Retrospective | SIGNA Architect, GE 3T | 3 | Adults | 24 | 7 |
| Liu et al[49] | Aug-21 | Australia | Prospective | SIGNA Pioneer, GE 3T | 3 | HC | 30 | 15 |
| Lee et al[50] | Aug-21 | South Korea | Retrospective | Discovery MR 750w 3T , GE | 3 | Pediatrics | 106 | 54 |
| Li et al[51] | Jun-21 | China | Prospective | SIGNA Pioneer, GE 3T | 3 | Adults | 40 | 47.5 females |
| Vanderhasselt et al[52] | Jun-21 | Belgium | Retrospective | Ingenia, Philips | 3 | Preterm infants | 70 | 39 |
| Murata et al[53] | May-21 | Japan | Prospective | Ingenia, Philips | 1.5 | Phantom | - | - |
| Hagiwara et al[54] | May-21 | Japan | Prospective | Discovery 750w 3T, GE | 3 | Adults | 35 + 18 | 6 and 2 |
| Gao et al[55] | Apr-21 | China | Retrospective | SIGNA Pioneer, GE 3T | 3 | Adults | 80 | 1 |
| Lou et al[56] | Apr-21 | China | Prospective | SIGNA Pioneer, GE 3T | 3 | Adults | 36 | 5 |
| Fujita et al[57] | Mar-21 | Japan | Prospective | Ingenia; Philips | 1.5 | Adults | 23 | 6 |
| Hagiwara et al[58] | Mar-21 | Japan | Prospective | MAGNETOM Prisma, Siemens 3T | 3 | Adults | 114 | 53 |
| Meng et al[59] | Mar-21 | China | Prospective | SIGNA Pioneer MR, GE 3T | 3 | Adults | 90 | 63 |
| Vogrig et al[60] | Mar-21 | France | Retrospective | Optima® MR450w GE 1.5T | 1.5 | Adults | 49 | 21 |
| Fujioka et al[61] | Feb-21 | Japan | Retrospective | Signa Pioneer; GE 3T | 3 | Adults | 37 | 0 |
| Schmidbauer et al[62] | Dec-22 | Austria | Retrospective | Ingenia, Philips | 1.5 | Neonates | 31 | 18 |
| Aymerich et al[63] | Dec-22 | Spain | Prospective | Magnetom Aera, Siemens | 1.5 | Adults | 27 | 9 |
| Bao et al[64] | Nov-22 | China | Prospective | GE Signa Pioneer 3T | 3 | Adults | 943 | 357 |
| Lian et al[65] | Nov-22 | China | Prospective | Signa Pioneer, GE 3T | 3 | Adults | 63 | 33 |
| Meng et al [66] | Oct-22 | China | Retrospective | SIGNA Pioneer MR, GE 3T | 3 | Adults | 122 | 0 |
| Zorigt et al[67] | Oct-22 | Japan | Retrospective | GE Healthcare 1.5 T | 1.5 | Adults | 99 | 61 |
| Ludovichetti et al[68] | Oct-22 | Switzerland | Retrospective | Siemens Skyra 3T and Philips Ellition X 3T | 3 | Adults | 35 | 6 |
| Zhang et al [69] | Sep-22 | China | Prospective | Signa Pioneer; GE 3T | 3 | Adults | 132 | 98 |
| Ladopoulos et al[70] | Aug-22 | Germany | Retrospective | Aera; Siemens | 1.5 | Adults | 122 | 54 |
| Andica et al[71] | Jul-22 | Japan | Retrospective | Discovery MR750w; GE | 3 | Adults | 67 | 14 |
| Coban et al[72] | Jul-22 | Turkey | Prospective | Aera; Siemens | 1.5 | Pediatrics | 28 | 10 |
| André et al[73] | Jul-22 | Belgium | Prospective | GE | 1.5 | Adults | 43 | 27 |
| Cao et al[74] | Jun-22 | China | Prospective | SIGNA Pioneer, GE 3T | 3 | Adults | 87 | 31 |
| Schneider et al[75] | Jun-22 | Germany | Prospective | Magnetom Aera 1.5, Achieva Philips 3T | 1.5, 3 | Adults | 94 | NR |
| Kikuchi et al[76] | Jun-22 | Japan | Prospective | Ingenia 3.0 T CX; Philips | 3 | Adults | 13 | 6 |
| Zhu et al[77] | May-22 | China | Prospective | SIGNA Pioneer MR, GE 3T | 3 | Adults | 100 | 63 |
| Konar et al[78] | May-22 | USA | Prospective | Discovery 3.0 T MR750w 3T | 3 | Adults | 11 | 5 |
| Kim et al[79] | Apr-22 | South korea | Prospective | NR | NR | Preterm noenates | 49 | 28 |
| Gouel et al[80] | Apr-22 | France | Prospective | Optima MR450w GE | 1.5 | Adults | 10 | 8 |
| Zhang et al[81] | Apr-22 | China | Retrospective | Discovery MR750w GE 3T | 3 | Adults | 95 | 0 |
| Maekawa et al[82] | Mar-22 | Japan | Retrospective | Discovery MR750w GE 3T | 3 | Adults | 31 | 5 |
| Gao et al[83] | Mar-22 | China | Retrospective | Signa Pioneer; GE 3T | 3 | Adults | 115 | 1 |
| Su et al[84] | Feb-22 | China | Prospective | Signa pioneer GE 3T | 3 | Pediatrics | 37 | 32 |
| Tatsuo et al[85] | Feb-22 | Japan | Mixed | Magnetom Vida; Siemens | 3 | Adults | 27 | 14 |
| Li et al[86] | Nov-23 | China | Prospective | Signa pioneer GE 3T | 3 | Pediatrics | 51 | 40 |
| Krajnc et al[87] | Oct-23 | Austria | Retrospective | Philips Ingenia Elition | 3 | Adults | 30 | 8 |
| Li et al[88] | Oct-23 | China | Retrospective | Signa Pioneer, GE 3T | 3 | Adults | 121 | 0 |
| Peretti et al[89] | Sep-23 | Italy | Prospective | Multiple | 1.5, 3, 7 | Model creation | NA | NA |
| Warntjes et al[90] | Aug-23 | Sweden | Prospective | Multiple | 1.5, 3 | Adults | 12 | NR |
| Yang et al[91] | Aug-23 | China | Prospective | Pioneer, GE Healthcare | 3 | Adults | 59 | 45 |
| Cao et al[92] | Aug-23 | China | Prospective | GE Architect MR 3.0T | 3 | Adults | 137 | 137 |
| Hwang et al [93] | Jul-23 | USA | Prospective | Discovery MR750w GE 3T | 3 | Adults | 181 | 0 |
| Ni et al[94] | Jun-23 | China | Prospective | GE SIGNA Architect 3.0T | 3 | Adults | 97 | 54 |
| Dong et al[95] | May-23 | China | Prospective | GE SIGNATM Architect 3T | 3 | Neonates | 70 | NR |
| Zhang et al[96] | Apr-23 | China | Retrospective | Signa Pioneer, GE 3T | 3 | Adults | 97 | 0 |
| Zheng et al[97] | Feb-23 | China | Prospective | Signa Pioneer, GE 3T | 3 | Adults | 34 | 13 |
| Wang et al[98] | Jan-23 | China | Retrospective | Architect, GE 3T | 3 | Adults | 58 | 49 |
| Zhang et al[99] | Jan-23 | China | Prospective | Signa Premier, GE 3T | 3 | Adults | 74 | 0 |
| Yang et al[100] | Jan-23 | China | Prospective | Discovery MR 750 3T, GE | 3 | Adults | 108 | 77 |
| Schmidbauer et al[101] | Jan-24 | Austria | Retrospective | Ingenia, Philips 1.5T | 1.5 | Preterm | 33 | 17 |
| Nasser et al[102] | Jan-24 | India | Prospective | various | 1.5, 3 | Adults | 314 | 147 |

*NR = Not Reported, HC= Healthy Controls*
